# Supplementary material for: The structural basis of BCR-ABL recruitment of GRB2 in chronic myelogenous leukemia
Source: PubMed Central journal article supplement — Biophys J. 2022 May 31;121(12):2251–65. doi: 10.1016/j.bpj.2022.05.030 (PMC9279350; doi:10.1016/j.bpj.2022.05.030), 2022-05-31
Supplement: mmc1.pdf [file mmc1.pdf]

**Biophysical Journal, Volume 121**

**Supplemental information**

**The structural basis of BCR-ABL recruitment of GRB2 in chronic myelogenous leukemia**

**Yonglan Liu, Hyunbum Jang, Mingzhen Zhang, Chung-Jung Tsai, Ryan Maloney, and Ruth Nussinov**

# The structural basis of BCR-ABL recruitment of GRB2 in chronic myelogenous leukemia

Yonglan Liu<sup>a</sup>, Hyunbum Jang<sup>b</sup>, Mingzhen Zhang<sup>b</sup>, Chung-Jung Tsai<sup>b</sup>, Ryan Maloney<sup>a</sup> and Ruth Nussinov<sup>b,c,\*</sup>

<sup>a</sup>Computational Structural Biology Section, Cancer Innovation Laboratory, National Cancer Institute, Frederick, MD 21702, U.S.A.

<sup>b</sup>Computational Structural Biology Section, Cancer Innovation Laboratory, Frederick National Laboratory for Cancer Research, Frederick, MD 21702, U.S.A.

<sup>c</sup>Department of Human Molecular Genetics and Biochemistry, Sackler School of Medicine, Tel Aviv University, Tel Aviv 69978, Israel

Author for correspondence:

Tel: 301-846-5579

E-mail: [NussinoR@mail.nih.gov](mailto:NussinoR@mail.nih.gov)

The authors declare no potential conflicts of interest.

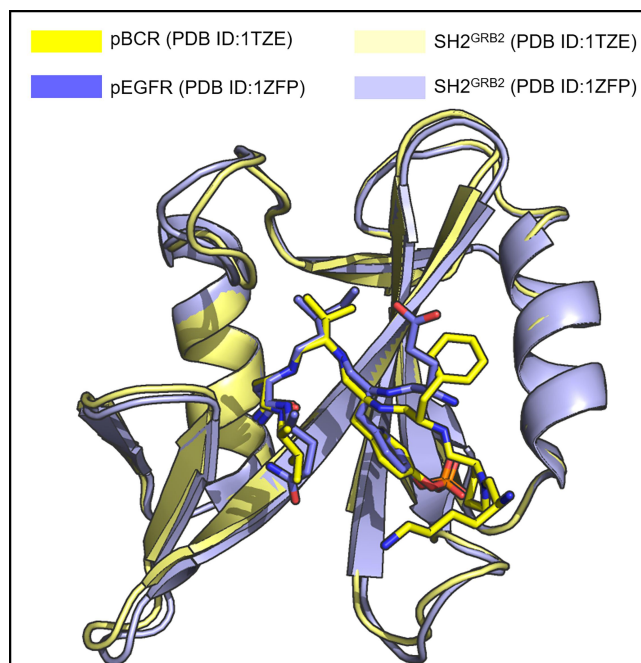

**Figure S1.** Superimposition of the conformations from the two different crystal structures of SH2<sup>GRB2</sup> in complex with pBCR (<sub>174</sub>KPFpYVNV<sub>180</sub>) (PDB ID: 1TZE) and pEGFR (<sub>1067</sub>EpYINQ<sub>1071</sub>) (PDB ID: 1ZFP) peptides. SH2<sup>GRB2</sup> shown as cartoon is colored light yellow and light blue in complex with pBCR and pEGFR, respectively. Both pBCR and pEGFR peptides shown as sticks are colored yellow and blue, respectively.

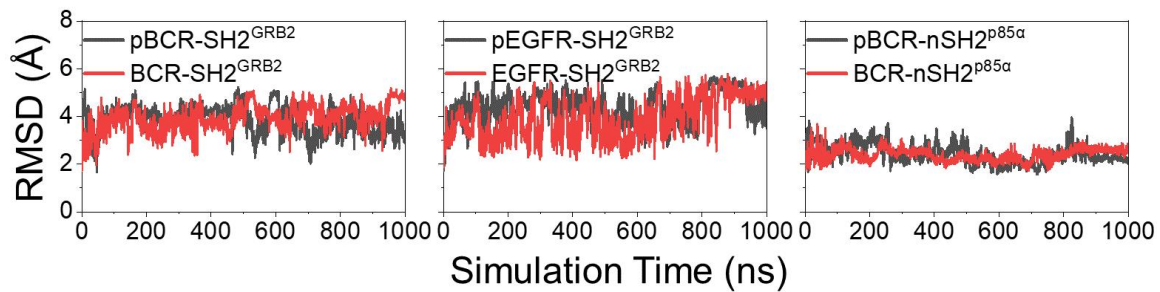

**Figure S2.** Time evolution of root-mean-square deviations (RMSDs) for pBCR-SH2<sup>GRB2</sup> and BCR-SH2<sup>GRB2</sup>, pEGFR-SH2<sup>GRB2</sup> and EGFR-SH2<sup>GRB2</sup>, and pBCR-nSH2<sup>p85α</sup> and BCR-nSH2<sup>p85α</sup>.

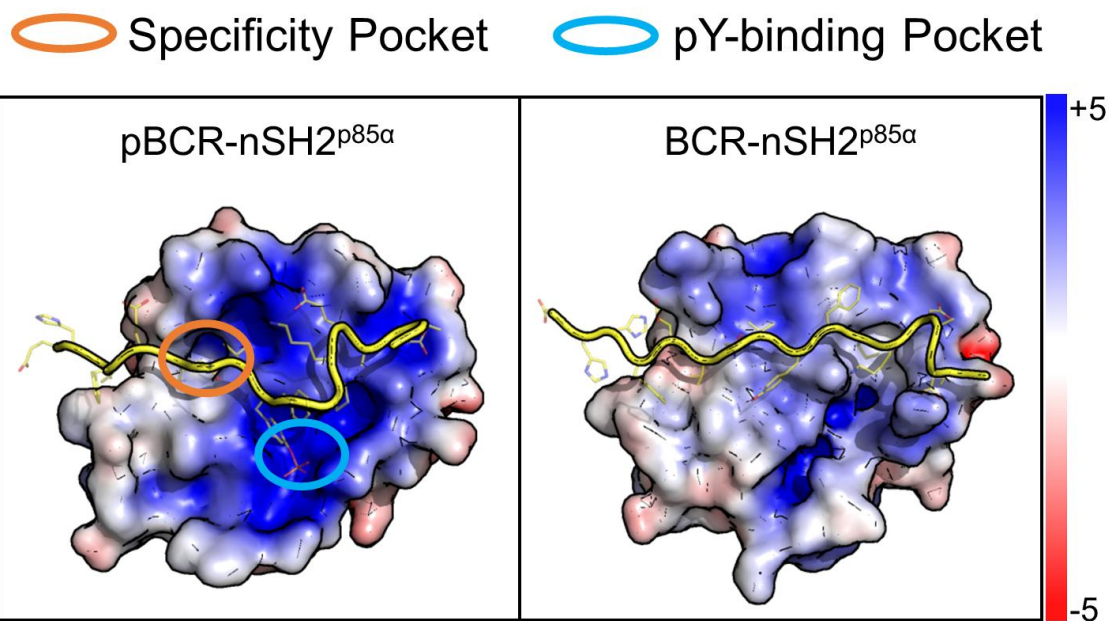

**Figure S3.** Binding modes of pBCR–nSH2<sup>p85α</sup> and BCR–nSH2<sup>p85α</sup> systems. nSH2<sup>p85α</sup> shown as electrostatic surface is colored based on the charge properties (red, negative charge; blue, positive charge), characterizing the electrostatic surfaces of nSH2<sup>p85α</sup>. The peptides shown as tubes are colored yellow. The cartoon structures of protein represent the averaged structures over the last half of the simulations. The representative structures account for 63.6% and 60.8 % of the ensemble structures over the last half of the trajectories for pBCR–nSH2<sup>p85α</sup> and BCR–nSH2<sup>p85α</sup>, respectively.

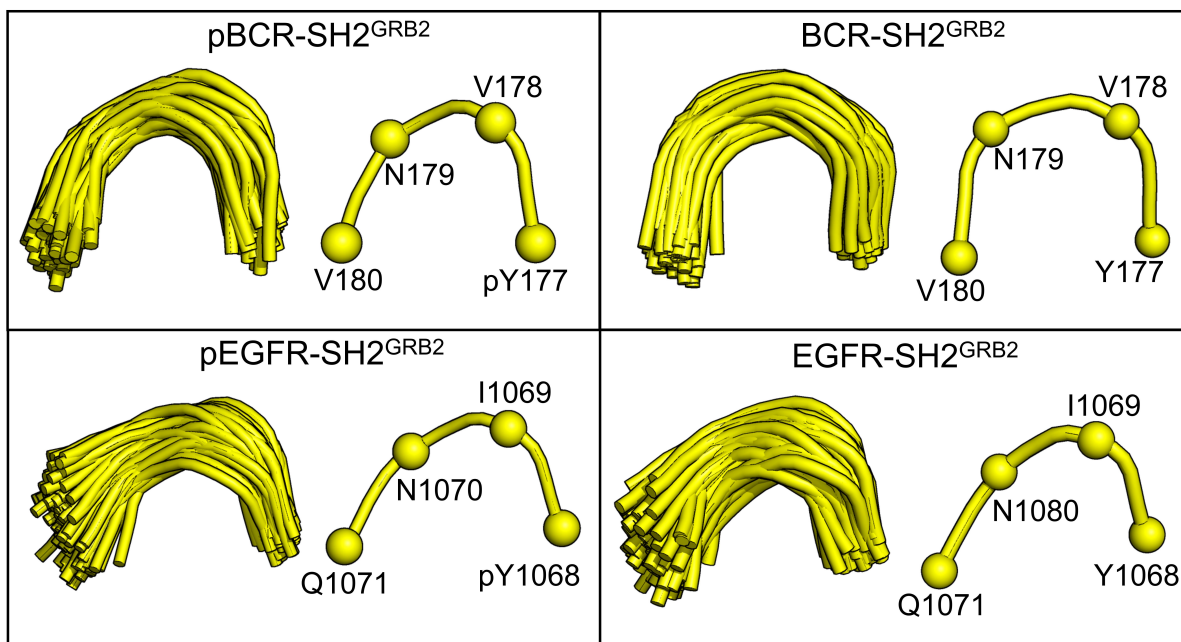

**Figure S4.** Structural alignment (left) of the type I  $\beta$ -turn region (residues from the pY position to the +3 position C-terminal to pY) and the representative conformation of type I  $\beta$ -turn (right) for each peptide in the bound state for the pBCR-SH2<sup>GRB2</sup>, BCR-SH2<sup>GRB2</sup>, pEGFR-SH2<sup>GRB2</sup>, and EGFR-SH2<sup>GRB2</sup> systems. In the cartoons, the peptides are shown as tubes. In the representative conformations, spheres denote the C $\alpha$  atoms of  $\beta$ -turn residues. These residues are marked on each peptide. Superimpositions of the aligned structures were obtained from the last half of the simulations.

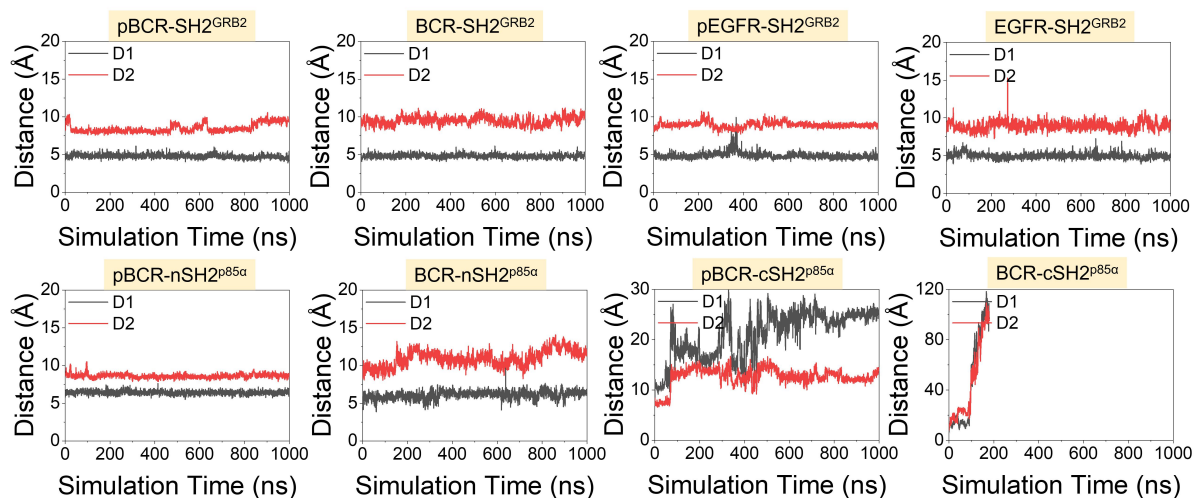

**Figure S5.** Time evolution of D1 and D2 for pBCR–SH2<sup>GRB2</sup> and BCR–SH2<sup>GRB2</sup>, pEGFR–SH2<sup>GRB2</sup> and EGFR–SH2<sup>GRB2</sup>, and pBCR–nSH2<sup>p85α</sup> and BCR–nSH2<sup>p85α</sup>, and pBCR–cSH2<sup>p85α</sup> and BCR–cSH2<sup>p85α</sup>. D1 is the distance between the Cα atom of N179 in pBCR/BCR, or N1070 in pEGFR/EGFR, and the center of mass of the Cα atoms of the residues (F108, K109, L120, and W121 in SH2<sup>GRB2</sup>; I381, F392, Y416, and N417 in nSH2<sup>p85α</sup>; and C670, F681, H706, and L710 in cSH2<sup>p85α</sup>) forming the specificity pocket of the SH2 domains. D2 is the distance between the Cα atom of pY177 in pBCR, Y177 in BCR, pY1068 in pEGFR, or Y1068 in EGFR, and the Cα atoms of the residues (R67, R86, S88, S90, S96, H107, and K109 in SH2<sup>GRB2</sup>; R340, R358, S361, T362, K382, and L380 in nSH2<sup>p85α</sup>; and R631, R639, H669, and V671 in cSH2<sup>p85α</sup>) forming the pY-binding pocket of the SH2 domains.

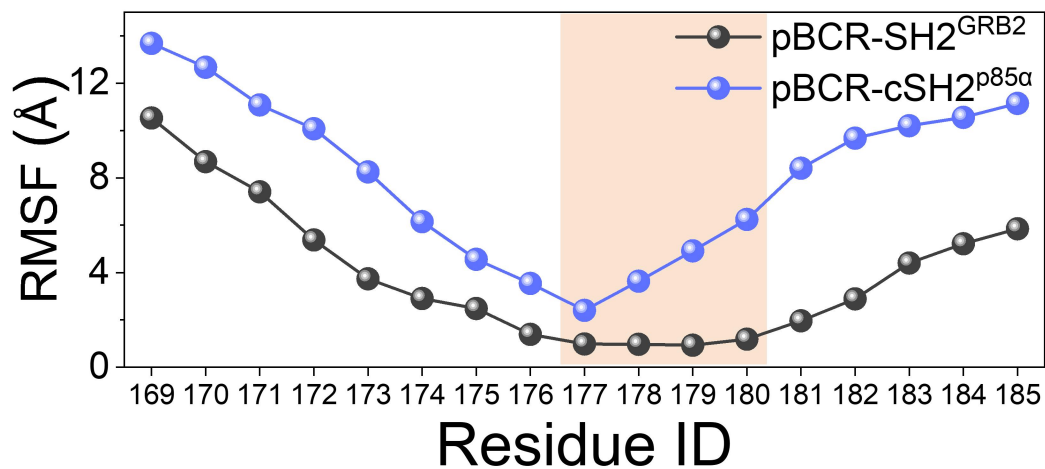

**Figure S6.** Root-mean-square fluctuations (RMSFs) of pBCR in the pBCR-SH2<sup>GRB2</sup> and pBCR-cSH2<sup>p85α</sup> systems. RMSFs are calculated for the last half of the simulations.



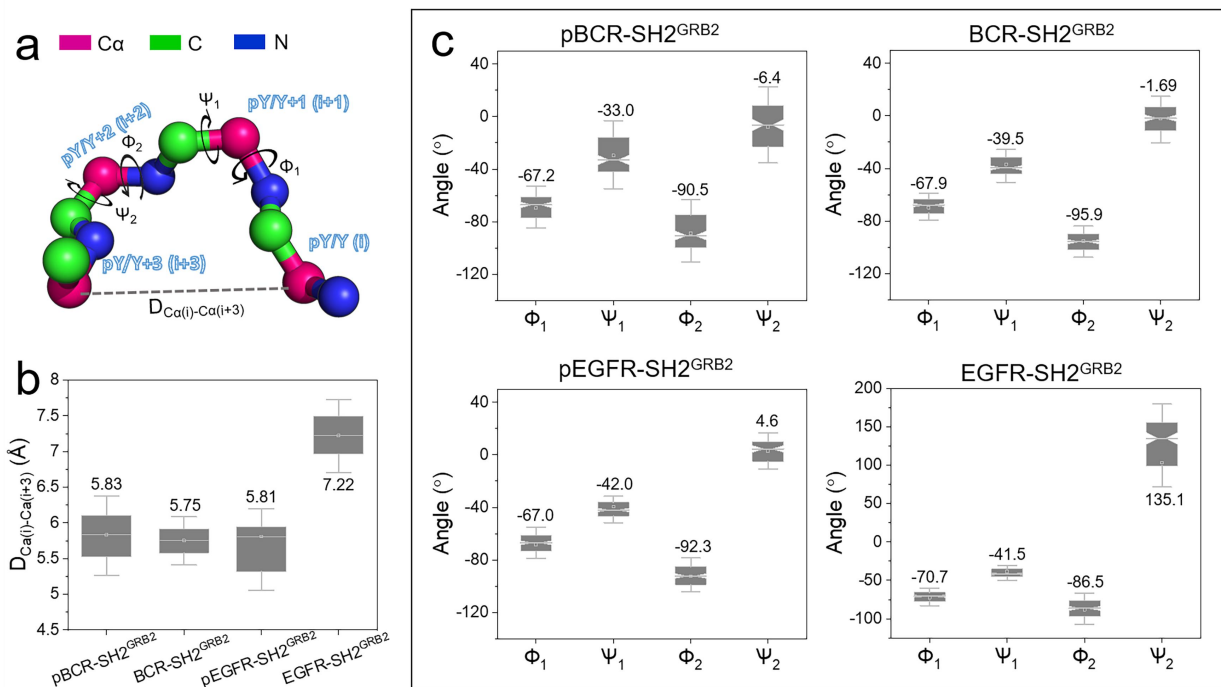

**Figure S7.** Characterization of type I  $\beta$ -turn conformation of pY/Y-peptides in complex with SH2<sup>GRB2</sup>. (a) Definition of  $D_{Ca(i)-Ca(i+3)}$  and the torsion angles of  $\phi_1$ ,  $\psi_1$ ,  $\phi_2$ , and  $\psi_2$ . (b)  $D_{Ca(i)-Ca(i+3)}$  and (c)  $\phi_1$ ,  $\psi_1$ ,  $\phi_2$ , and  $\psi_2$  of the peptides in pBCR-SH2<sup>GRB2</sup>, BCR-SH2<sup>GRB2</sup>, pEGFR-SH2<sup>GRB2</sup>, and EGFR-SH2<sup>GRB2</sup>.

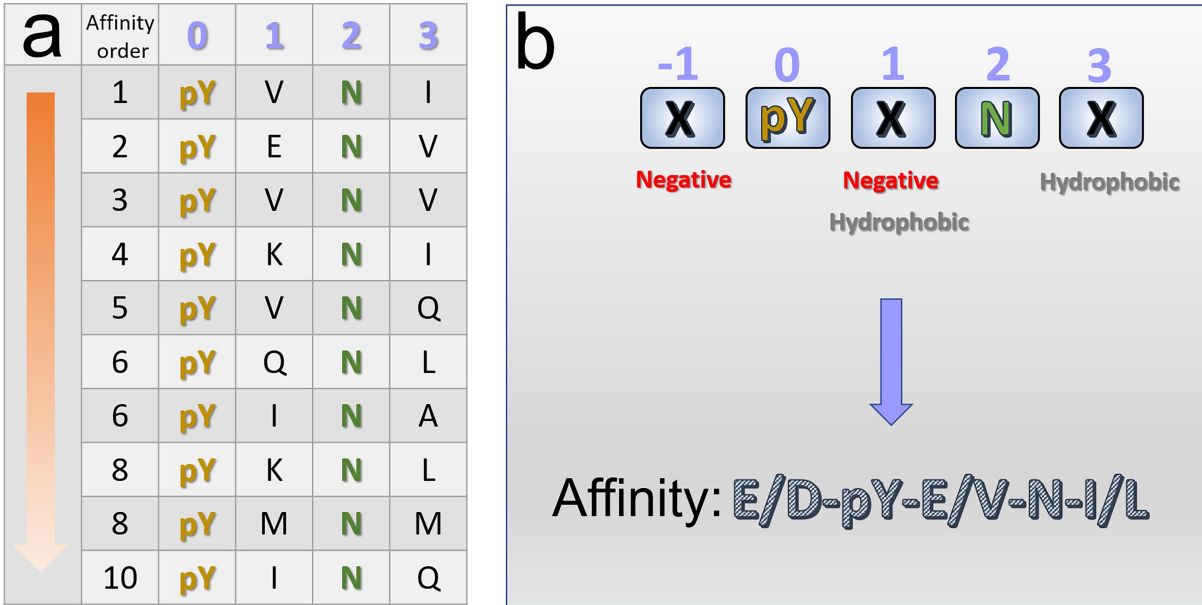

**Figure S8.** (a) SH2<sup>GRB2</sup>-binding motifs collected from literatures. The motifs are sorted in the decreasing order of binding affinity to SH2<sup>GRB2</sup>. (b) Putative five-residue motifs for the binding of SH2<sup>GRB2</sup> with the optimal binding affinity.

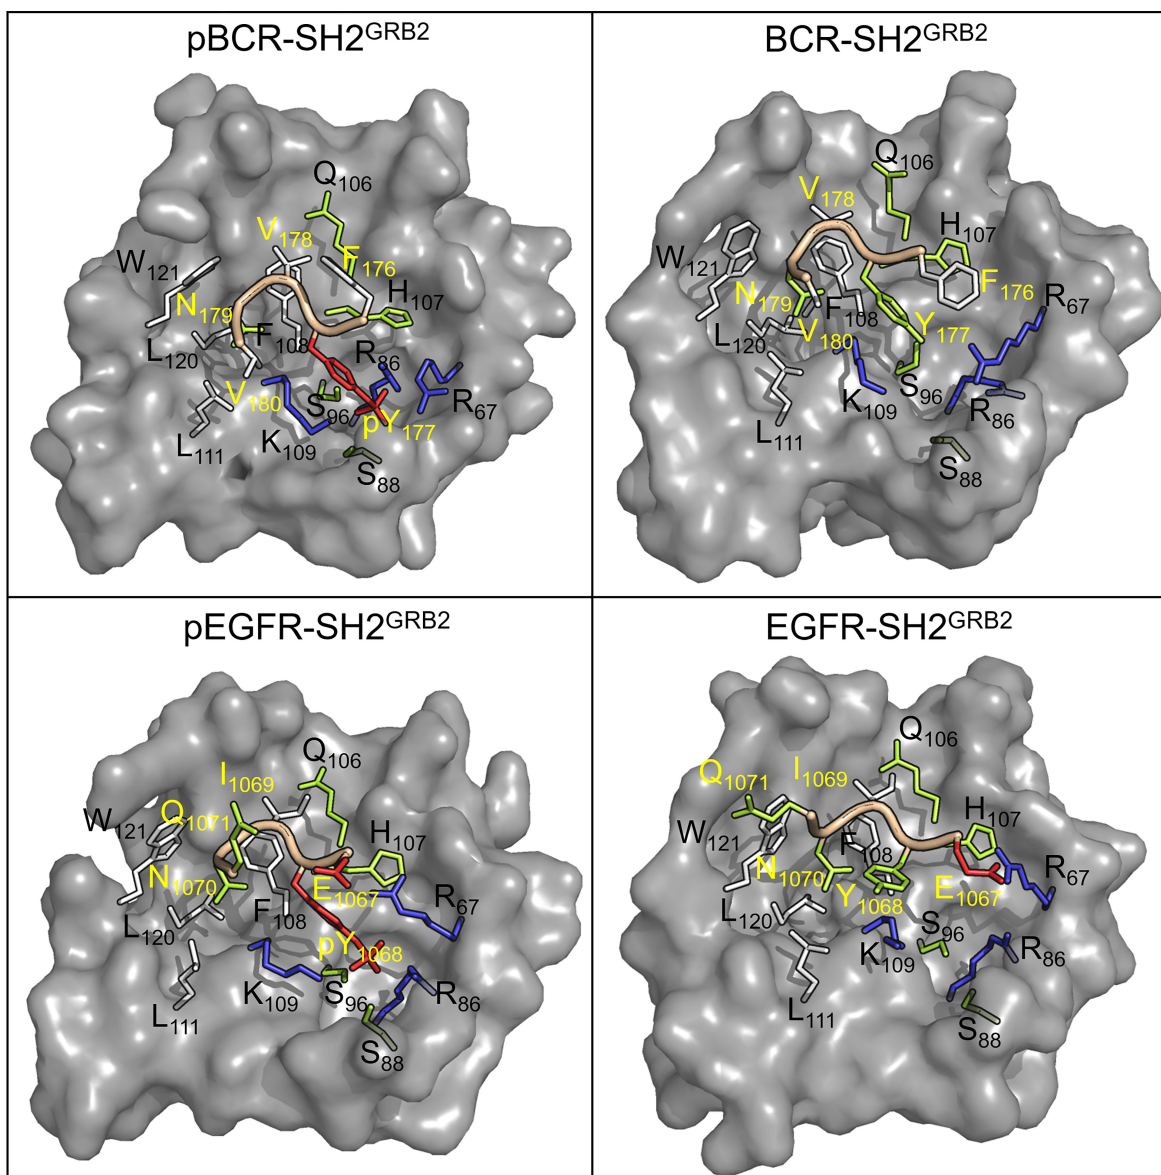

**Figure S9.** Interaction interfaces of pBCR-SH2<sup>GRB2</sup>, BCR-SH2<sup>GRB2</sup>, pEGFR-SH2<sup>GRB2</sup>, and EGFR-SH2<sup>GRB2</sup> systems. Interfacial residues are shown as sticks. Hydrophobic, hydrophilic, positively charged, and negatively charged residues are colored white, green, blue, and red, respectively. The yellow and black labels denote the peptide and SH2<sup>GRB2</sup> residues, respectively.

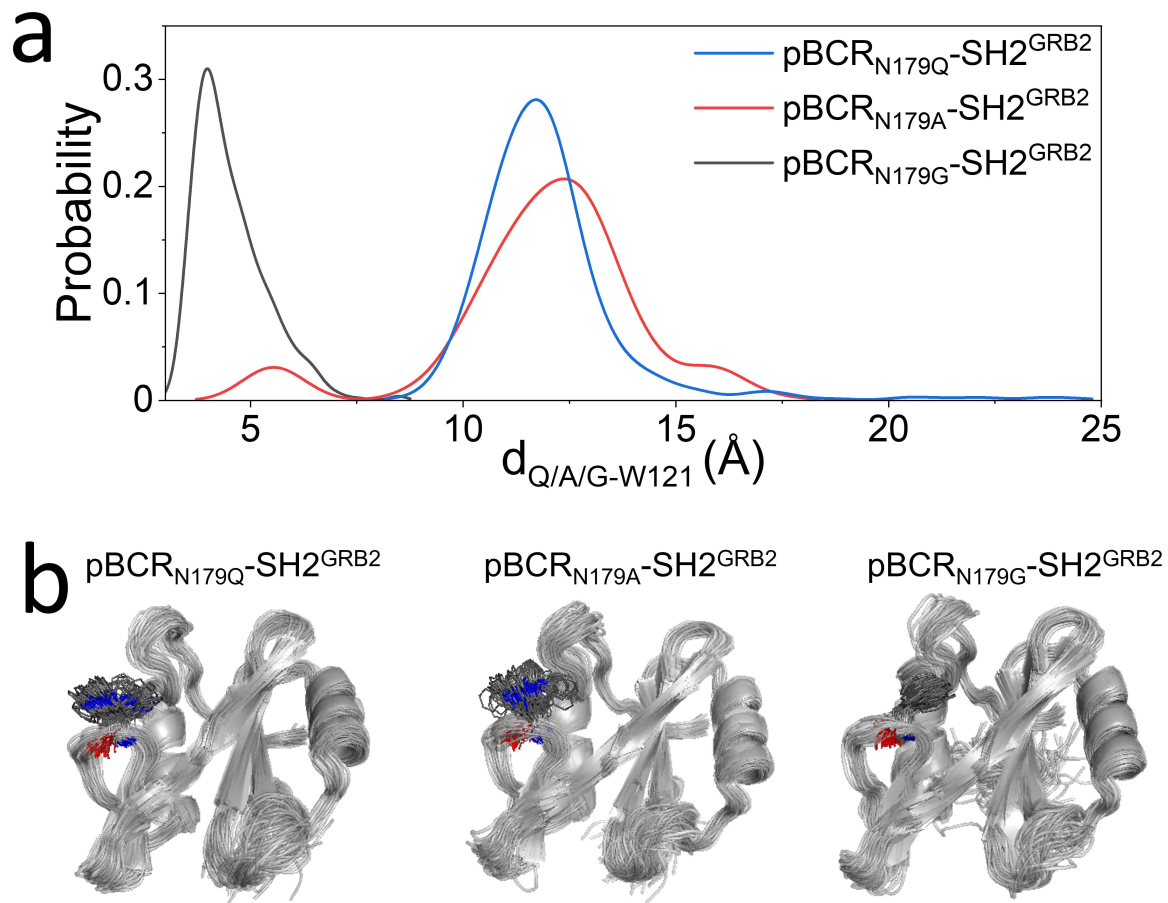

**Figure S10.** (a) Probability distribution functions of the distance between W121 in SH2<sup>GRB2</sup> and Q179/A179/G179 in pBCR<sub>N179Q</sub>/pBCR<sub>N179A</sub>/pBCR<sub>N179G</sub>,  $d_{Q/A/G-W121}$ , and (b) superimposed snapshots representing the dynamic behaviors of W121 sidechain for pBCR<sub>N179Q</sub>-SH2<sup>GRB2</sup>, pBCR<sub>N179A</sub>-SH2<sup>GRB2</sup>, and pBCR<sub>N179G</sub>-SH2<sup>GRB2</sup>.

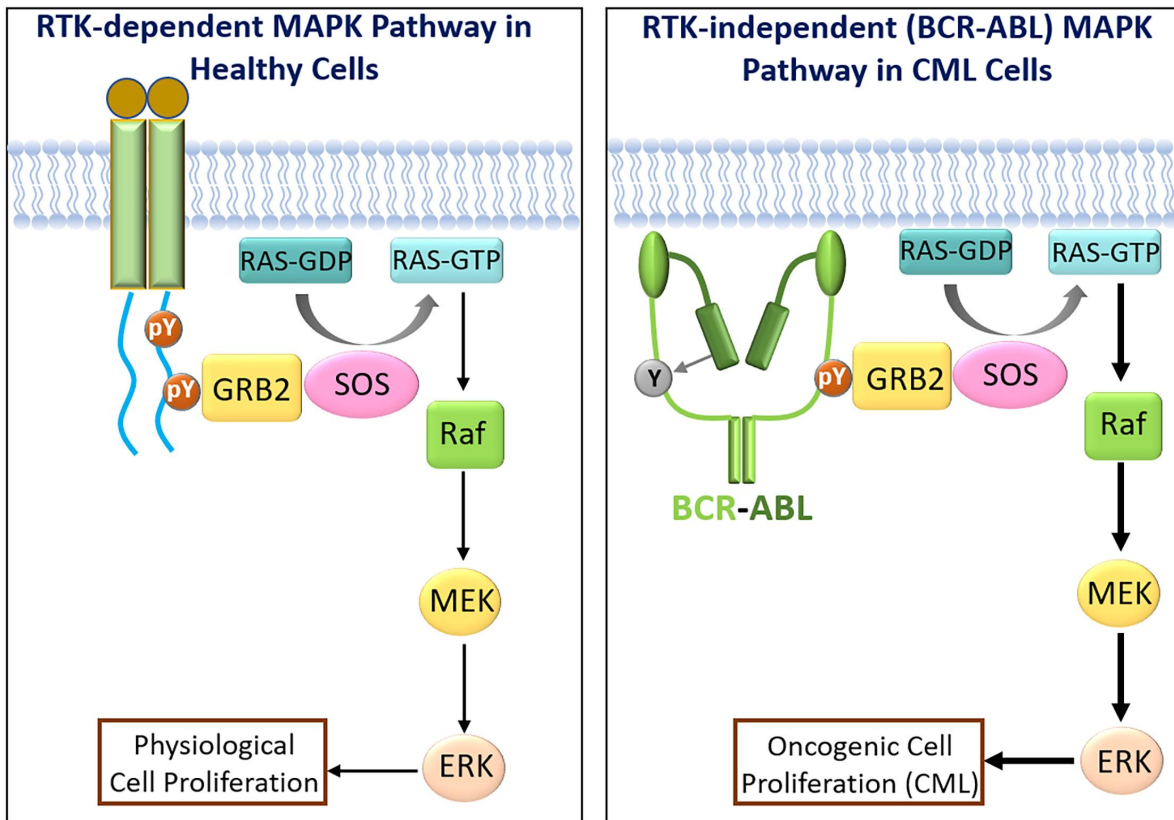

**Figure S11.** Schematic illustration of RTK-dependent in healthy cells and BCR-ABL-dependent Ras/MAPK signaling pathways in CML cells.

**Table S1.** Intermolecular pair residues with contact probability  $\geq 60\%$  for pY/Y-SH2<sup>GRB2</sup> systems.

| pBCR-SH2 <sup>GRB2</sup> | BCR-SH2 <sup>GRB2</sup> | pEGFR-SH2 <sup>GRB2</sup> | EGFR-SH2 <sup>GRB2</sup> |
|--------------------------|-------------------------|---------------------------|--------------------------|
| F176-H107                | F176-R67                | E1067-R67                 | E1067-H107               |
| pY177-R67                | F176-H107               | E1067-H107                | Y1068-S96                |
| pY177-R86                | Y177-S96                | pY1068-R67                | Y1068-H107               |
| pY177-S88                | Y177-H107               | pY1068-R86                | Y1068-F108               |
| pY177-S96                | Y177-F108               | pY1068-S88                | Y1068-K109               |
| pY177-H107               | Y177-K109               | pY1068-S96                | I1069-Q106               |
| pY177-F108               | V178-Q106               | pY1068-H107               | I1069-H107               |
| pY177-K109               | V178-H107               | pY1068-F108               | I1069-F108               |
| V178-Q106                | V178-F108               | pY1068-K109               | I1069-W121               |
| V178-H107                | V178-W121               | I1069-Q106                | I1069-S141               |
| V178-F108                | V178-S141               | I1069-H107                | N1070-F108               |
| N179-F108                | N179-F108               | I1069-F108                | N1070-K109               |
| N179-K109                | N179-K109               | I1069-W121                | N1070-L111               |
| N179-L111                | N179-L111               | N1070-F108                | N1070-L120               |
| N179-L120                | N179-L120               | N1070-K109                | N1070-W121               |
| N179-W121                | N179-W121               | N1070-L111                |                          |
| V180-K109                | V180-K109               | N1070-L120                |                          |
| V180-L111                | V180-L111               | N1070-W121                |                          |
| F182-W121                | E185-R67                |                           |                          |
| E185-R142                |                         |                           |                          |

**Table S2.** pY-peptides of different proteins with affinity to the SH2<sup>GRB2</sup> domain.

| Protein Name  | pTyr Peptide Sequence                                   | Reference |
|---------------|---------------------------------------------------------|-----------|
| BCR           | <sup>174</sup> KPFpYVNV <sub>180</sub>                  | (1)       |
| EGFR          | <sup>1067</sup> EpYINQ <sub>1071</sub>                  | (2)       |
| β-PDGFR       | <sup>701</sup> LQHHS DKRRPPSAELpYSNALPVG <sub>723</sub> | (3)       |
| DF3           | <sup>1243</sup> pYTNP <sub>1246</sub>                   | (4)       |
| SIT           | <sup>90</sup> pYGNL <sub>93</sub>                       | (5)       |
| SIT           | <sup>188</sup> pYANS <sub>191</sub>                     | (5)       |
| IRS-1         | <sup>891</sup> SPGEpYVNIEFGS <sub>902</sub>             | (6)       |
| SHC           | <sup>314</sup> DPSpYVNVNQNQL <sub>324</sub>             | (6)       |
| SHC           | <sup>236</sup> DHQpYYND <sub>242</sub>                  | (7)       |
| SHP2          | <sup>542</sup> pYTNI <sub>545</sub>                     | (8)       |
| SHP2          | <sup>584</sup> pYENV <sub>587</sub>                     | (9)       |
| FAK           | <sup>924</sup> VpYENV <sub>928</sub>                    | (10)      |
| c-MET         | <sup>1356</sup> pYVNV <sub>1359</sub>                   | (11)      |
| c-Kit/SCFR    | <sup>694</sup> QEDHAEAAALpYKNLLHSKES <sub>713</sub>     | (12)      |
| c-Kit/SCFR    | <sup>928</sup> ISESTNHIpYSNLANCSPNR <sub>946</sub>      | (12)      |
| CD28          | <sup>188</sup> HSDpYMNMTPR <sub>197</sub>               | (13,14)   |
| AICD          | <sup>679</sup> QNGpYENPTY <sub>687</sub>                | (15)      |
| Modified AICD | <sup>679</sup> QNGpYVNPTY <sub>687</sub>                | (15)      |
| LAT           | <sup>108</sup> ASpYENE <sub>113</sub>                   | (16)      |
| LAT           | <sup>125</sup> DDpYHNP <sub>130</sub>                   | (16)      |
| LAT           | <sup>169</sup> DDpYVNV <sub>174</sub>                   | (16)      |

---

|          |                                        |      |
|----------|----------------------------------------|------|
| LAT      | <sup>189</sup> REpYVNV <sub>194</sub>  | (16) |
| LAT      | <sup>224</sup> PDpYENL <sub>229</sub>  | (16) |
| PLD2     | <sup>168</sup> NpYLN <sub>172</sub>    | (17) |
| PLD2     | <sup>178</sup> FpYRNY <sub>182</sub>   | (17) |
| HER2/Neu | <sup>1138</sup> EpYVNQ <sub>1142</sub> | (18) |

---



**Table S3.** Intermolecular pair residues with interaction energies <-20 kcal/mol for pY/Y-peptide-SH2<sup>GRB2</sup> systems.

| pBCR-SH2 <sup>GRB2</sup> | Energy<br>(kcal/mol) | BCR-SH2 <sup>GRB2</sup> | Energy<br>(kcal/mol) | pEGFR-SH2 <sup>GRB2</sup> | Energy<br>(kcal/mol) | EGFR-SH2 <sup>GRB2</sup> | Energy<br>(kcal/mol) |
|--------------------------|----------------------|-------------------------|----------------------|---------------------------|----------------------|--------------------------|----------------------|
| pY177-R67                | -138.35±3.85         | E185-R67                | -63.64±20.64         | pY1068-R67                | -128.26±4.64         | E1067-R67                | -40.59±4.90          |
| pY177-R86                | -127.18±2.66         | E185-R86                | -29.01±7.12          | pY1068-R86                | -95.83±5.23          |                          |                      |
| pY177-K109               | -144.68±5.61         | E185-K109               | -59.05±17.37         | pY1068-K109               | -154.9±8.45          |                          |                      |
| pY177-S88                | -27.29±3.31          |                         |                      | pY1068-S88                | -29.73±2.33          |                          |                      |
| pY177-S90                | -26.11±2.58          |                         |                      | E1067-R67                 | -49.14±3.48          |                          |                      |
| pY177-S96                | -28.51±2.79          |                         |                      |                           |                      |                          |                      |
| E185-R142                | -78.82±15.89         |                         |                      |                           |                      |                          |                      |

**Table S4.** Hydrogen bonds between residues in SH2<sup>GRB2</sup> domain and residues in pBCR, BCR, pEGFR, and EGFR.

| System                    | Donor                   | Acceptor                   | Occupancy (%) |
|---------------------------|-------------------------|----------------------------|---------------|
| pBCR–SH2 <sup>GRB2</sup>  | R67 <sup>GRB2</sup> -S  | pY177 <sup>pBCR</sup> -S   | 100.00        |
|                           | R86 <sup>GRB2</sup> -S  | pY177 <sup>pBCR</sup> -S   | 100.00        |
|                           | S88 <sup>GRB2</sup> -S  | pY177 <sup>pBCR</sup> -S   | 69.36         |
|                           | S90 <sup>GRB2</sup> -S  | pY177 <sup>pBCR</sup> -S   | 54.80         |
|                           | S96 <sup>GRB2</sup> -S  | pY177 <sup>pBCR</sup> -S   | 99.04         |
|                           | K109 <sup>GRB2</sup> -S | pY177 <sup>pBCR</sup> -S   | 90.56         |
|                           | V178 <sup>pBCR</sup> -B | H107 <sup>GRB2</sup> -B    | 92.56         |
|                           | K109 <sup>GRB2</sup> -B | N179 <sup>pBCR</sup> -S    | 95.60         |
|                           | N179 <sup>pBCR</sup> -S | K109 <sup>GRB2</sup> -B    | 97.60         |
| N179 <sup>pBCR</sup> -S   | L120 <sup>GRB2</sup> -B | 86.08                      |               |
| BCR–SH2 <sup>GRB2</sup>   | V178 <sup>BCR</sup> -B  | H107 <sup>GRB2</sup> -B    | 91.60         |
|                           | N179 <sup>BCR</sup> -S  | K109 <sup>GRB2</sup> -B    | 97.12         |
|                           | K109 <sup>GRB2</sup> -B | N179 <sup>BCR</sup> -S     | 94.40         |
|                           | N179 <sup>BCR</sup> -S  | L120 <sup>GRB2</sup> -B    | 86.40         |
|                           | R67 <sup>GRB2</sup> -S  | E185 <sup>BCR</sup> -S     | 59.36         |
| pEGFR–SH2 <sup>GRB2</sup> | R67 <sup>GRB2</sup> -S  | pY1068 <sup>pEGFR</sup> -S | 98.40         |
|                           | R86 <sup>GRB2</sup> -S  | pY1068 <sup>pEGFR</sup> -S | 85.04         |
|                           | S88 <sup>GRB2</sup> -S  | pY1068 <sup>pEGFR</sup> -S | 93.52         |
|                           | S96 <sup>GRB2</sup> -S  | pY1068 <sup>pEGFR</sup> -S | 82.40         |
|                           | K109 <sup>GRB2</sup> -S | pY1068 <sup>pEGFR</sup> -S | 98.64         |

|                          |                           |                           |       |
|--------------------------|---------------------------|---------------------------|-------|
|                          | I1069 <sup>pEGFR</sup> -B | H107 <sup>GRB2</sup> -B   | 87.44 |
|                          | N1070 <sup>pEGFR</sup> -S | K109 <sup>GRB2</sup> -B   | 97.44 |
|                          | K109 <sup>GRB2</sup> -B   | N1070 <sup>pEGFR</sup> -S | 97.44 |
|                          | N1070 <sup>pEGFR</sup> -S | L120 <sup>GRB2</sup> -B   | 85.76 |
| <hr/>                    |                           |                           |       |
| EGFR-SH2 <sup>GRB2</sup> | I1069 <sup>EGFR</sup> -B  | H107 <sup>GRB2</sup> -B   | 86.64 |
|                          | K109 <sup>GRB2</sup> -B   | N1070 <sup>EGFR</sup> -S  | 94.56 |
|                          | N1070 <sup>EGFR</sup> -S  | K109 <sup>GRB2</sup> -B   | 89.28 |
|                          | N1070 <sup>EGFR</sup> -S  | L120 <sup>GRB2</sup> -B   | 76.24 |
| <hr/>                    |                           |                           |       |

Hydrogen bonds listed in the table have the occupancy > 50% during last 500-ns simulations. S and B indicate sidechain and backbone of residues.

## References

1. Rahuel, J., B. Gay, D. Erdmann, A. Strauss, C. Garcia-Echeverria, P. Furet, G. Caravatti, H. Fretz, J. Schoepfer, and M. G. Grutter. 1996. Structural basis for specificity of Grb2-SH2 revealed by a novel ligand binding mode. *Nat Struct Biol.* 3(7):586-589.
2. Rahuel, J., C. Garcia-Echeverria, P. Furet, A. Strauss, G. Caravatti, H. Fretz, J. Schoepfer, and B. Gay. 1998. Structural basis for the high affinity of amino-aromatic SH2 phosphopeptide ligands. *J Mol Biol.* 279(4):1013-1022.
3. Arvidsson, A. K., E. Rupp, E. Nanberg, J. Downward, L. Ronnstrand, S. Wennstrom, J. Schlessinger, C. H. Heldin, and L. Claessonwelsch. 1994. Tyr-716 in the Platelet-Derived Growth-Factor Beta-Receptor Kinase Insert Is Involved in Grb2 Binding and Ras Activation. *Molecular and Cellular Biology.* 14(10):6715-6726.
4. Pandey, P., S. Kharbanda, and D. Kufe. 1995. Association of the DF3/MUC1 breast cancer antigen with Grb2 and the Sos/Ras exchange protein. *Cancer Res.* 55(18):4000-4003.
5. Pfrepper, K. I., A. Marie-Cardine, L. Simeoni, Y. Kuramitsu, A. Leo, J. Spicka, I. Hilgert, J. Scherer, and B. Schraven. 2001. Structural and functional dissection of the cytoplasmic domain of the transmembrane adaptor protein SIT (SHP2-interacting transmembrane adaptor protein). *Eur J Immunol.* 31(6):1825-1836.
6. Skolnik, E. Y., C. H. Lee, A. Batzer, L. M. Vicentini, M. Zhou, R. Daly, M. J. Myers, Jr., J. M. Backer, A. Ullrich, M. F. White, and et al. 1993. The SH2/SH3 domain-containing protein GRB2 interacts with tyrosine-phosphorylated IRS1 and Shc: implications for insulin control of ras signalling. *EMBO J.* 12(5):1929-1936.
7. Harmer, S. L., and A. L. DeFranco. 1997. Shc contains two Grb2 binding sites needed for efficient formation of complexes with SOS in B lymphocytes. *Mol Cell Biol.* 17(7):4087-4095.
8. Bennett, A. M., T. L. Tang, S. Sugimoto, C. T. Walsh, and B. G. Neel. 1994. Protein-tyrosine-phosphatase SHPTP2 couples platelet-derived growth factor receptor beta to Ras. *Proc Natl Acad Sci U S A.* 91(15):7335-7339.
9. Vogel, W., and A. Ullrich. 1996. Multiple in vivo phosphorylated tyrosine phosphatase SHP-2 engages binding to Grb2 via tyrosine 584. *Cell Growth Differ.* 7(12):1589-1597.
10. Schlaepfer, D. D., S. K. Hanks, T. Hunter, and P. van der Geer. 1994. Integrin-mediated signal transduction linked to Ras pathway by GRB2 binding to focal adhesion kinase. *Nature.* 372(6508):786-791.
11. Schiering, N., E. Casale, P. Caccia, P. Giordano, and C. Battistini. 2000. Dimer formation through domain swapping in the crystal structure of the Grb2-SH2-Ac-pYVNV complex. *Biochemistry.* 39(44):13376-13382.
12. Thömmes, K., J. Lennartsson, M. CARLBERG, and L. Rönstrand. 1999. Identification of Tyr-703 and Tyr-936 as the primary association sites for Grb2 and Grb7 in the c-Kit/stem cell factor receptor. *Biochemical Journal.* 341(1):211-216.
13. Higo, K., T. Ikura, M. Oda, H. Morii, J. Takahashi, R. Abe, and N. Ito. 2013. High resolution crystal structure of the Grb2 SH2 domain with a phosphopeptide derived from CD28. *PLoS One.* 8(9):e74482.
14. Schneider, H., Y. C. Cai, K. V. Prasad, S. E. Shoelson, and C. E. Rudd. 1995. T cell antigen CD28 binds to the GRB-2/SOS complex, regulators of p21ras. *Eur J Immunol.* 25(4):1044-1050.
15. Das, S., M. Raychaudhuri, U. Sen, and D. Mukhopadhyay. 2011. Functional Implications of the Conformational Switch in AICD Peptide upon Binding to Grb2-SH2 Domain. *Journal of Molecular Biology.* 414(2):217-230.

16. Cho, S., C. A. Velikovsky, C. P. Swaminathan, J. C. Houtman, L. E. Samelson, and R. A. Mariuzza. 2004. Structural basis for differential recognition of tyrosine-phosphorylated sites in the linker for activation of T cells (LAT) by the adaptor Gads. *EMBO J.* 23(7):1441-1451.
17. Di Fulvio, M., N. Lehman, X. Lin, I. Lopez, and J. Gomez-Cambronero. 2006. The elucidation of novel SH2 binding sites on PLD2. *Oncogene.* 25(21):3032-3040.
18. Dankort, D., N. Jeyabalan, N. Jones, D. J. Dumont, and W. J. Muller. 2001. Multiple ErbB-2/Neu phosphorylation sites mediate transformation through distinct effector proteins. *Journal of Biological Chemistry.* 276(42):38921-38928.
